# Supplementary material
Source: publisher figshare collection journal article supplement (https://aacr.figshare.com/articles/dataset/_/23627584)

# Figure S1

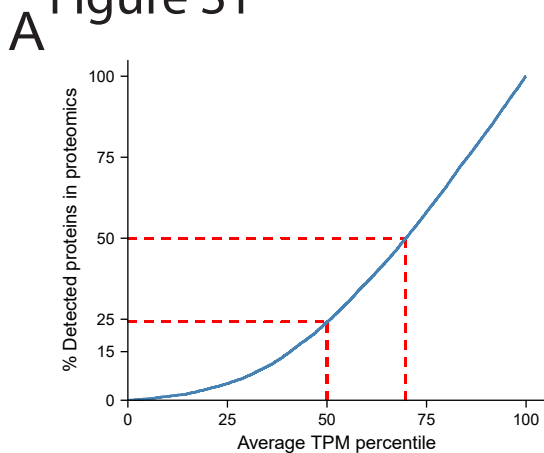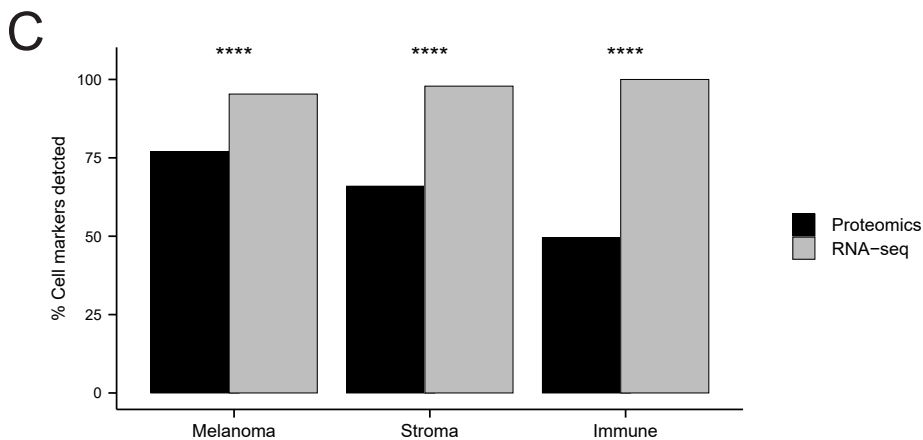

**B**

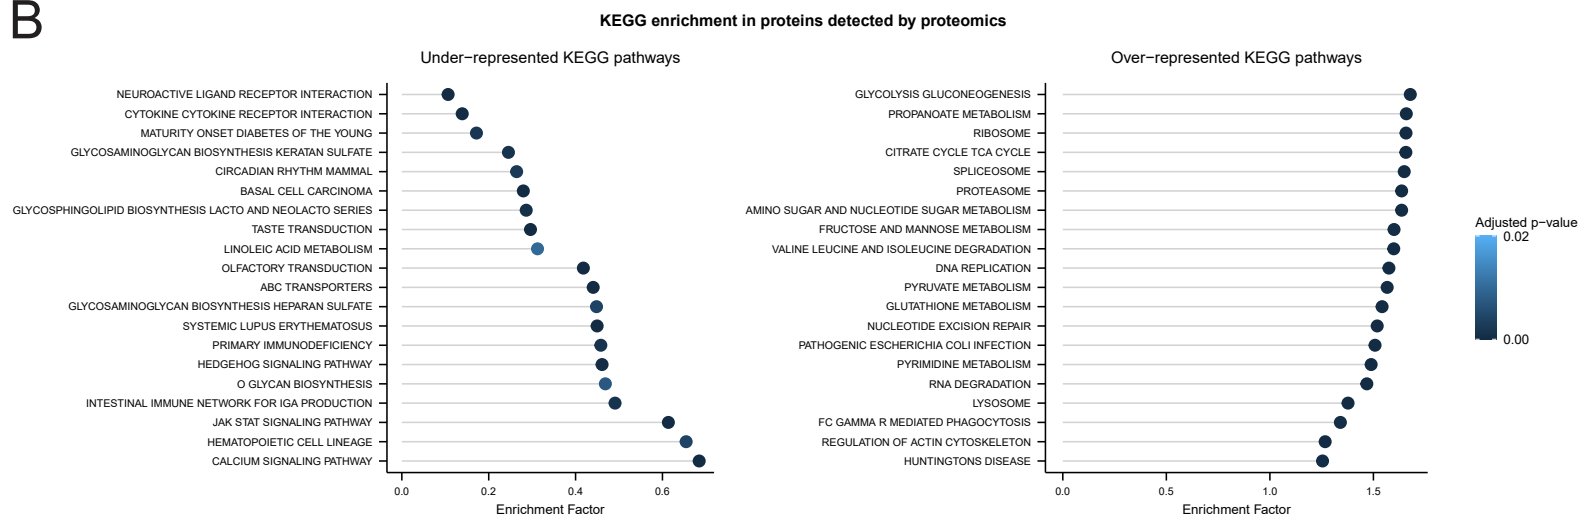

**D**

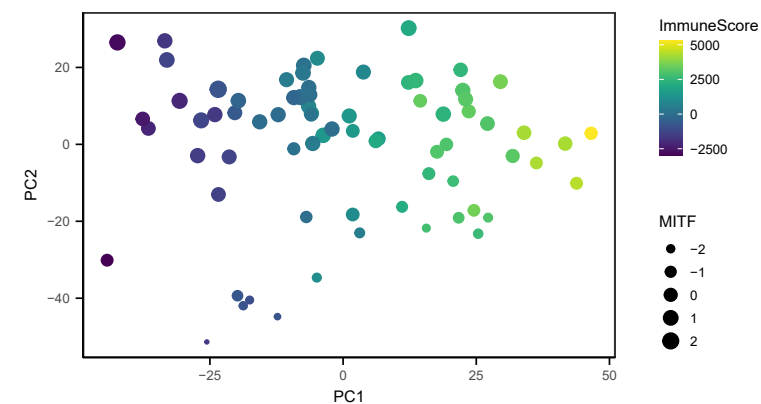

**E**

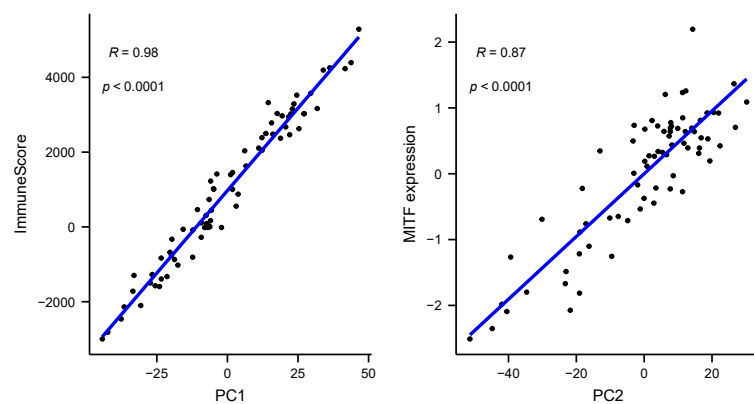

**F**

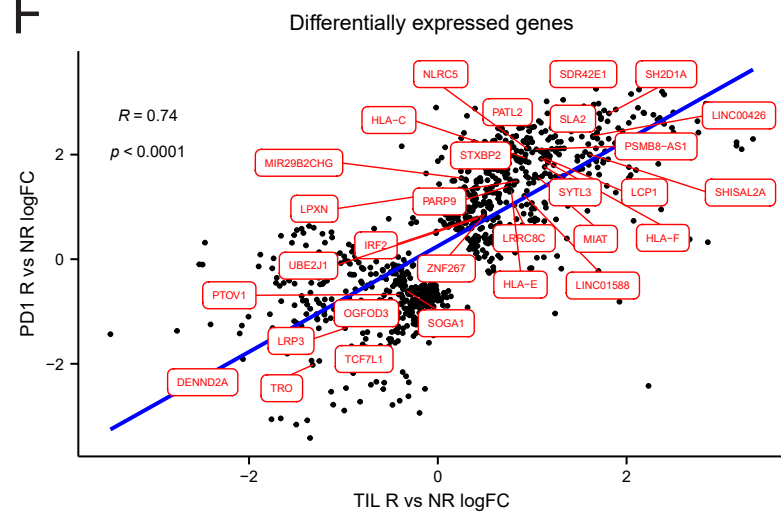

**G**

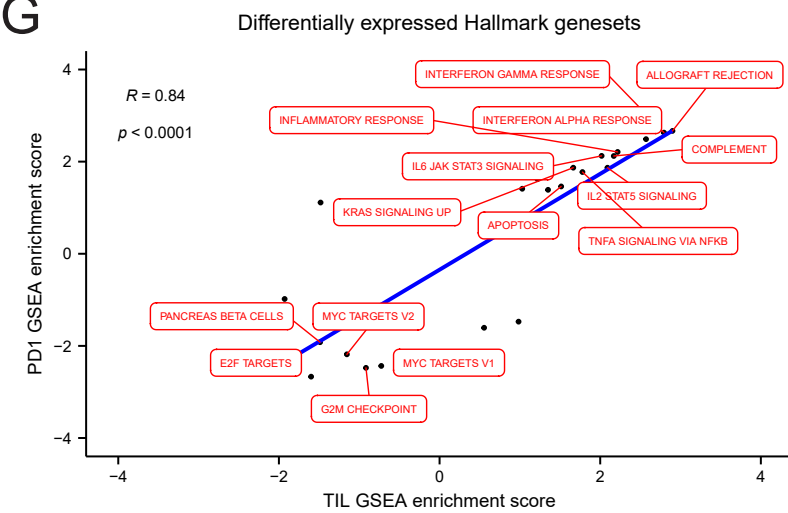

Supplement: Supplementary file 1 [file 41458402]
